# Supplementary material
Source: Springer Nature journal article supplement (https://www.springermedizin.de/resource/supplementary/12993_2009_216_MOESM7_ESM.pdf/9617310)

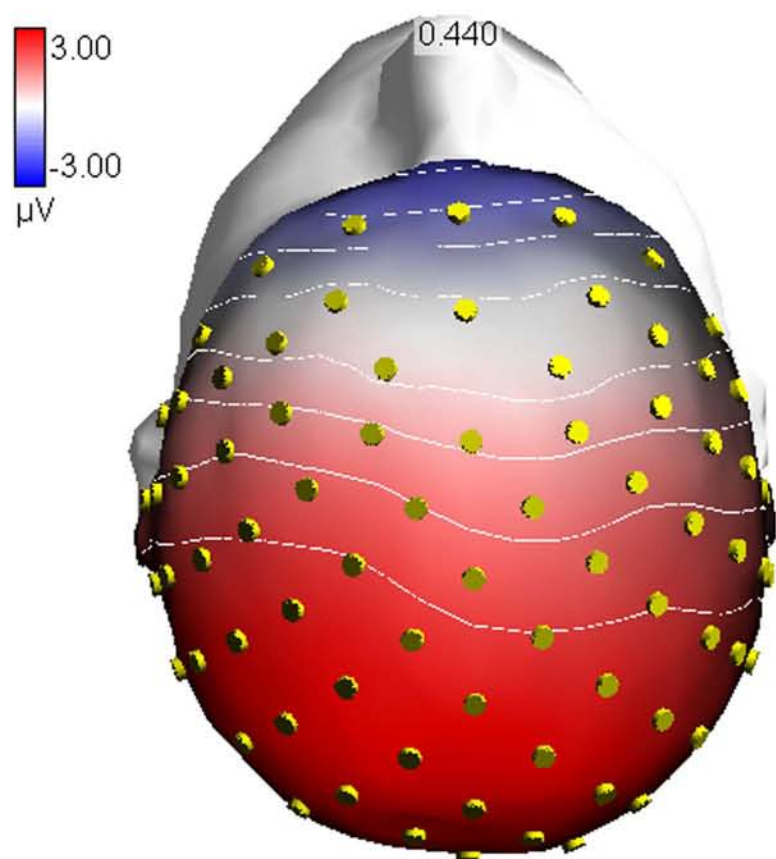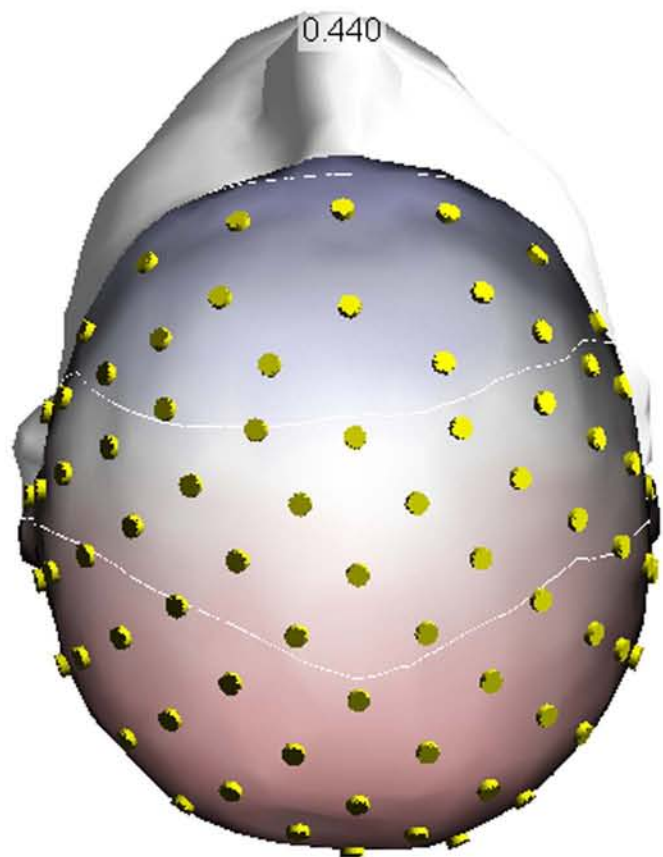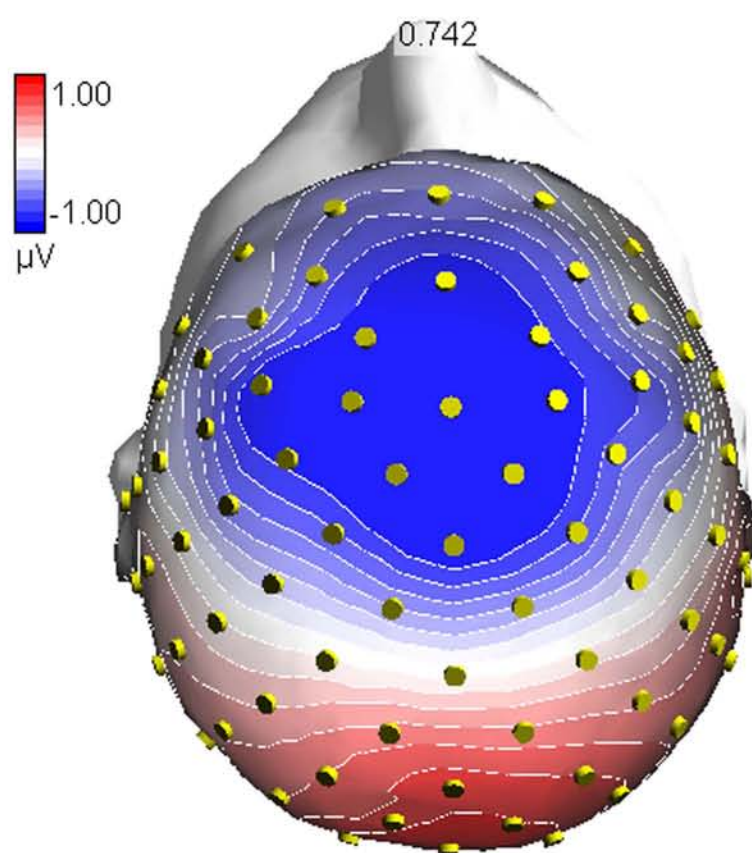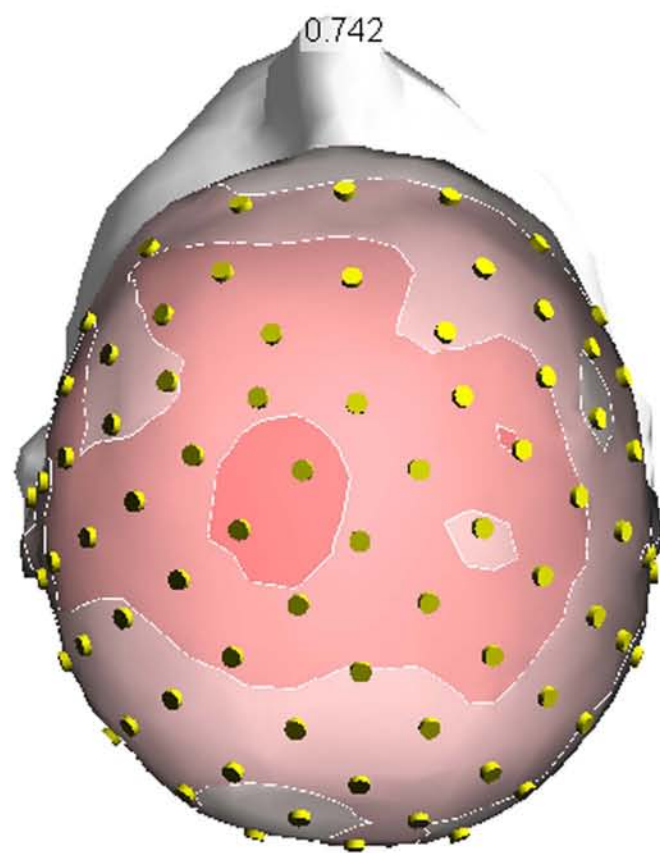

Pseudo-target

Location-irrelevant lure

Supplement: MOESM7 [file 9617310]
